# Supplementary material for: Systems analysis of iron metabolism: the network of iron pools and fluxes
Source: Springer Nature journal article supplement (doi:10.1186/1752-0509-4-112), 2010-08-13

# Fe-Loaded

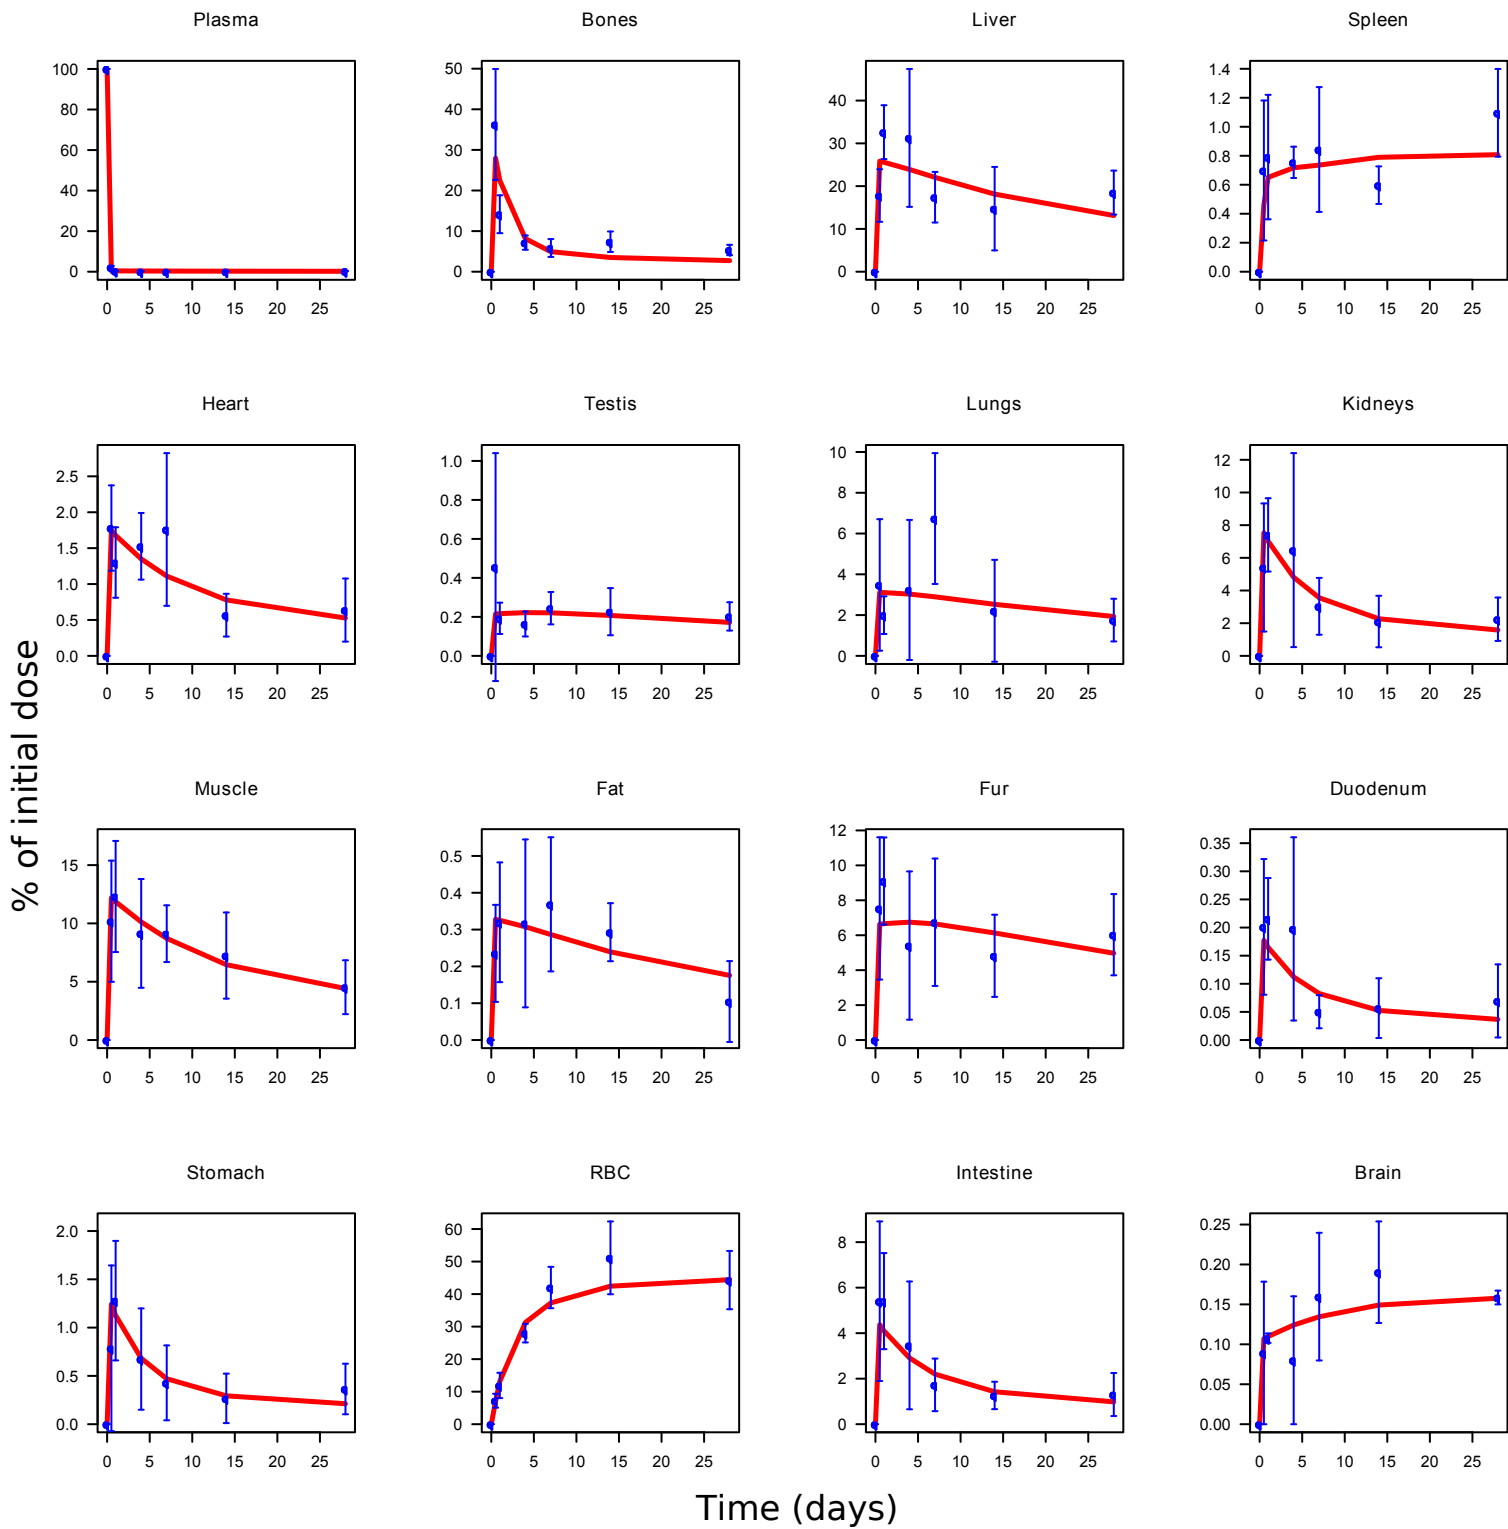

Supplement: 12918_2009_501_MOESM7_ESM.pdf [file 12918_2009_501_MOESM7_ESM.pdf]
